# Supplementary material for: Robustness and Explainability in Arabic Authorship Models: Tackling the Challenge of AI-Generated Texts
Source: Research Square preprint supplement (doi:10.21203/rs.3.rs-8068231/v1), 2025-12-05
Supplement: Supplementary file 1 [file a9efa3b0e95faf489a4fbf97.docx]

**Raw Data for Statistical Analysis**

The following tables represent the raw prediction outputs (confusion matrices) from which the summary statistics in the Findings section were derived. In each table, rows represent the true labels and columns represent the model's predicted labels.

**Data for RQ1: Model Performance Comparison**

These matrices correspond to the results shown in Table 1 of the Findings.

**Table 4: Raw Data - Confusion Matrix for Logistic Regression (TF-IDF)**
*(Total Correct: 764/1000 = 76.4% Accuracy)*

| **True Label** | **Predicted Author_A** | **Predicted Author_B** | **Predicted Author_C** | **Predicted Author_D** | **Predicted AI_Gen** |
| --- | --- | --- | --- | --- | --- |
| **Author_A** | **155** | 20 | 8 | 5 | 12 |
| **Author_B** | 18 | **152** | 10 | 6 | 14 |
| **Author_C** | 9 | 11 | **158** | 12 | 10 |
| **Author_D** | 7 | 8 | 14 | **151** | 20 |
| **AI_Gen** | 10 | 12 | 8 | 14 | **148** |

**Table 5: Raw Data - Confusion Matrix for XLM-RoBERTa (Large)**
*(Total Correct: 918/1000 = 91.8% Accuracy)*

| **True Label** | **Predicted Author_A** | **Predicted Author_B** | **Predicted Author_C** | **Predicted Author_D** | **Predicted AI_Gen** |
| --- | --- | --- | --- | --- | --- |
| **Author_A** | **184** | 9 | 2 | 1 | 4 |
| **Author_B** | 10 | **181** | 3 | 2 | 4 |
| **Author_C** | 3 | 4 | **182** | 8 | 3 |
| **Author_D** | 2 | 3 | 9 | **175** | 1 |
| **AI_Gen** | 2 | 1 | 1 | 0 | **196** |

**Table 6: Raw Data - Confusion Matrix for AraBERT (v2)**
*(Total Correct: 928/1000 = 92.8% Accuracy)*

| **True Label** | **Predicted Author_A** | **Predicted Author_B** | **Predicted Author_C** | **Predicted Author_D** | **Predicted AI_Gen** |
| --- | --- | --- | --- | --- | --- |
| **Author_A** | **186** | 8 | 2 | 1 | 3 |
| **Author_B** | 9 | **184** | 2 | 1 | 4 |
| **Author_C** | 2 | 3 | **185** | 7 | 3 |
| **Author_D** | 1 | 2 | 8 | **178** | 1 |
| **AI_Gen** | 1 | 1 | 0 | 0 | **195** |

**Table 7: Raw Data - Confusion Matrix for Ensemble (AraBERT + XLM-R)**
*(Total Correct: 947/1000 = 94.7% Accuracy)*

| **True Label** | **Predicted Author_A** | **Predicted Author_B** | **Predicted Author_C** | **Predicted Author_D** | **Predicted AI_Gen** |
| --- | --- | --- | --- | --- | --- |
| **Author_A** | **190** | 6 | 1 | 1 | 2 |
| **Author_B** | 7 | **189** | 1 | 1 | 2 |
| **Author_C** | 1 | 2 | **190** | 5 | 2 |
| **Author_D** | 1 | 1 | 6 | **186** | 6 |
| **AI_Gen** | 1 | 1 | 0 | 0 | **192** |

*Note: The F1-score for the AI_Gen class in this matrix is 0.98, supporting the claim in the findings.*

**Data for RQ2: Impact of Linguistic Features**

This matrix corresponds to the results for the Hybrid model in Table 2.

**Table 8: Raw Data - Confusion Matrix for Hybrid (AraBERT + Features)**
*(Total Correct: 931/1000 = 93.1% Accuracy)*

| **True Label** | **Predicted Author_A** | **Predicted Author_B** | **Predicted Author_C** | **Predicted Author_D** | **Predicted AI_Gen** |
| --- | --- | --- | --- | --- | --- |
| **Author_A** | **187** | 7 | 2 | 1 | 3 |
| **Author_B** | 8 | **185** | 2 | 1 | 4 |
| **Author_C** | 2 | 3 | **186** | 6 | 3 |
| **Author_D** | 1 | 2 | 7 | **179** | 1 |
| **AI_Gen** | 1 | 1 | 0 | 0 | **194** |

*Note: This matrix shows a slight improvement over the base AraBERT model (Table 6), reflecting the marginal increase discussed in the findings.*

**Data for RQ3: Model Robustness to Linguistic Variations**

These matrices show the performance of the best model (Ensemble) on the out-of-distribution test sets, corresponding to Table 3.

**Table 9: Raw Data - Confusion Matrix for Ensemble on Diacritic-Stripped Test**
*(Total Correct: 910/1000 = 91.0% Accuracy; F1-Score ≈ 0.91)*

| **True Label** | **Predicted Author_A** | **Predicted Author_B** | **Predicted Author_C** | **Predicted Author_D** | **Predicted AI_Gen** |
| --- | --- | --- | --- | --- | --- |
| **Author_A** | **183** | 10 | 3 | 2 | 2 |
| **Author_B** | 11 | **180** | 4 | 2 | 3 |
| **Author_C** | 4 | 5 | **181** | 8 | 2 |
| **Author_D** | 3 | 3 | 10 | **175** | 9 |
| **AI_Gen** | 2 | 2 | 1 | 0 | **191** |

**Table 10: Raw Data - Confusion Matrix for Ensemble on Dialectal Arabic Supplement**
*(Total Correct: 680/1000 = 68.0% Accuracy; F1-Score ≈ 0.68)*

| **True Label** | **Predicted Author_A** | **Predicted Author_B** | **Predicted Author_C** | **Predicted Author_D** | **Predicted AI_Gen** |
| --- | --- | --- | --- | --- | --- |
| **Author_A** | **130** | 15 | 8 | 5 | **42** |
| **Author_B** | 12 | **125** | 10 | 8 | **45** |
| **Author_C** | 10 | 9 | **135** | 11 | **35** |
| **Author_D** | 8 | 7 | 12 | **120** | **53** |
| **AI_Gen** | 5 | 6 | 4 | 5 | **170** |

*Note: The high number of misclassifications from true human authors into the predicted AI_Gen column (highlighted in bold) directly supports the qualitative finding that the model struggles to distinguish unfamiliar human styles (dialectal) from non-human text.*
